Title: The value of inspiratory muscle training on post-stroke sarcopenia and its effect on

rehabilitation outcomes: A randomized controlled trial

All author names: Qianping Zhao, Chenlan Shao, Yongzheng Wang, Weiwei Zhao, Liang Wang, Wei Zhou

, Yuxing Mo

Affiliations: The Rehabilitation Medicine Center, Peoples Hospital of Deyang City, Deyang,

Sichuan Province, China.

Withdrawal statement: The authors have withdrawn their manuscript owing to that this manuscript

still needs to be revised. Therefore, the authors do not wish this work to be cited as reference

for the project. If you have any questions, please contact the corresponding author.
